# Supplementary material
Source: HighWire-hosted journal article supplement (https://erj.ersjournals.com/content/55/5/1902150)
Supplement: inline-supplementary-material-1 [file inline-supplementary-material-1.pdf]

## Appendix 1: Medline search strategy:

|    |                                                                                                                                                                    |
|----|--------------------------------------------------------------------------------------------------------------------------------------------------------------------|
| 1  | exp Asthma/                                                                                                                                                        |
| 2  | asthma*.mp.                                                                                                                                                        |
| 3  | (antiasthma* or anti-asthma*).mp.                                                                                                                                  |
| 4  | Respiratory Sounds/                                                                                                                                                |
| 5  | wheez*.mp.                                                                                                                                                         |
| 6  | bronchial spasm/                                                                                                                                                   |
| 7  | (bronchospas* or (bronch* adj3 spasm*)).mp.                                                                                                                        |
| 8  | exp bronchoconstriction/                                                                                                                                           |
| 9  | (bronchoconstrict* or (bronch* adj3 constrict*)).mp.                                                                                                               |
| 10 | Bronchial hyperreactivity/                                                                                                                                         |
| 11 | Respiratory hypersensitivity/                                                                                                                                      |
| 12 | ((bronchial* or respirat* or airway* or lung* or pulmonary) adj3 (hypersensitiv* or hyperreactiv* or allerg* or insufficien*)).ti,ab.                              |
| 13 | ((dust or mite*) adj3 (allerg* or hypersensitivity)).mp.                                                                                                           |
| 14 | 1 or 2 or 3 or 4 or 5 or 6 or 7 or 8 or 9 or 10 or 11 or 12 or 13                                                                                                  |
| 15 | Nitric Oxide/                                                                                                                                                      |
| 16 | nitric oxide.ti,ab.                                                                                                                                                |
| 17 | (feno or eno or exhaled no).ti,ab.                                                                                                                                 |
| 18 | (biomarker* or biological marker?).mp.                                                                                                                             |
| 19 | (marker? adj5 (inflamm* or eosinophil* or exhal* or breath* or airway? or asthma*)).mp.                                                                            |
| 20 | ((sign? or count?) adj5 (inflamm* or eosinophil*)).mp.                                                                                                             |
| 21 | Biomarkers/                                                                                                                                                        |
| 22 | 15 or 16 or 17 or 18 or 19 or 20 or 21                                                                                                                             |
| 23 | "Severity of Illness Index"/                                                                                                                                       |
| 24 | treatment failure/                                                                                                                                                 |
| 25 | exacerbation?.mp.                                                                                                                                                  |
| 26 | (asthma* adj3 (exacerbat* or acute* or status or sever* or worse* or respon* or emergen* or attack? or crisis or morbidit* or event? or episode? or outcome?)).mp. |
| 27 | ((acute* or sever*) adj3 (attack? or episode? or morbidit* or event?)).ti,ab.                                                                                      |
| 28 | (symptom* adj3 (exacerbat? or acute* or status or sever* or worse* or increas*)).mp.                                                                               |
| 29 | exp Anti-Bacterial Agents/                                                                                                                                         |
| 30 | (antibiotic? or anti-biotic? or antimicrob* or anti-microb* or antibacterial? or anti-bacterial?).mp.                                                              |
| 31 | exp *Adrenal Cortex Hormones/                                                                                                                                      |
| 32 | exp Adrenal Cortex Hormones/ad, tu                                                                                                                                 |
| 33 | exp Adrenal Cortex Hormones/ and (Drug Utilization/ or Drug Prescriptions/)                                                                                        |
| 34 | *Bronchodilator Agents/                                                                                                                                            |
| 35 | Bronchodilator Agents/ad, tu                                                                                                                                       |
| 36 | *Anti-Asthmatic Agents/                                                                                                                                            |
| 37 | Anti-Asthmatic Agents/ad, tu                                                                                                                                       |

|    |                                                                                                                                                                                                                                                                                                                                                                                   |
|----|-----------------------------------------------------------------------------------------------------------------------------------------------------------------------------------------------------------------------------------------------------------------------------------------------------------------------------------------------------------------------------------|
| 38 | ((steroid? or corticosteroid? or glucocorticoid? or dexamethasone or decadron or prednisolone or pediaped or prednisone or steraped or hydrocortisone or methylprednisolone or solucortef or solu-cortef or solumedrol or solu-medrol) adj5 (prescri* or utili* or use? or usage or modif* or adjust* or titrat* or control* or step* or intensi* or increas* or respon*)).ti,ab. |
| 39 | ((steroid? or corticosteroid? or glucocorticoid? or dexamethasone or decadron or prednisolone or pediaped or prednisone or steraped or hydrocortisone or methylprednisolone or solucortef or solu-cortef or solumedrol or solu-medrol) adj5 (systemic or oral* or intravenous*)).ti,ab.                                                                                           |
| 40 | (steroid? or corticosteroid? or glucocorticoid? or dexamethasone or decadron or prednisolone or pediaped or prednisone or steraped or hydrocortisone or methylprednisolone or solucortef or solu-cortef or solumedrol or solu-medrol).ti.                                                                                                                                         |
| 41 | ((therap* or treat* or manag*) adj3 (systemic or oral* or intravenous*)).ti,ab.                                                                                                                                                                                                                                                                                                   |
| 42 | ((therap* or treat*) adj3 (response? or fail*)).ti,ab.                                                                                                                                                                                                                                                                                                                            |
| 43 | hospitalization/ or patient admission/                                                                                                                                                                                                                                                                                                                                            |
| 44 | Emergency Service, Hospital/                                                                                                                                                                                                                                                                                                                                                      |
| 45 | (hospitali* or ((patient or hospital?) adj3 (admission? or admit*))).ti,ab.                                                                                                                                                                                                                                                                                                       |
| 46 | (emergenc* adj3 (ward? or department? or dept? or unit? or hospital*)).ti,ab.                                                                                                                                                                                                                                                                                                     |
| 47 | ((emergenc* or unscheduled or unplanned) adj3 (visit? or attendance? or admission?)).ti,ab.                                                                                                                                                                                                                                                                                       |
| 48 | 23 or 24 or 25 or 26 or 27 or 28 or 29 or 30 or 31 or 32 or 33 or 34 or 35 or 36 or 37 or 38 or 39 or 40 or 41 or 42 or 43 or 44 or 45 or 46 or 47                                                                                                                                                                                                                                |
| 49 | 14 and 22 and 48                                                                                                                                                                                                                                                                                                                                                                  |
| 50 | exp animals/ not humans.sh.                                                                                                                                                                                                                                                                                                                                                       |
| 51 | 49 not 50                                                                                                                                                                                                                                                                                                                                                                         |
| 52 | 14 and 22                                                                                                                                                                                                                                                                                                                                                                         |
| 53 | limit 52 to "reviews (maximizes specificity)"                                                                                                                                                                                                                                                                                                                                     |
| 54 | 51 or 53                                                                                                                                                                                                                                                                                                                                                                          |
