# Supplementary material
Source: HighWire-hosted journal article supplement (https://erj.ersjournals.com/content/55/5/1902150)
Supplement: inline-supplementary-material-4 [file inline-supplementary-material-4.pdf]

**Appendix 4: Post hoc analyses – odds ratios and 95% confidence intervals for fractional exhaled nitric oxide (FeNO) in relation to acute exacerbations of asthma after stepping down inhaled corticosteroids**

|                                                             | n/N (%)       |                   |             | Crude OR (95% CI), p value   |                              |                               |
|-------------------------------------------------------------|---------------|-------------------|-------------|------------------------------|------------------------------|-------------------------------|
| Subgroup (N)                                                | Low FeNO      | Intermediate FeNO | High FeNO   | Intermediate versus low FeNO | High versus low FeNO         | High versus intermediate FeNO |
| Participants in Wilson 2014 study (N=189)                   | 12/101 (11.9) | 6/66 (9.1)        | 6/22 (27.3) | 0.74 (0.26 to 2.08), P=0.571 | 2.78 (0.91 to 8.48), P=0.072 | 3.75 (1.06 to 13.2), P=0.040  |
| Participants excluding Wilson 2014 study (N=195)            | 10/99 (10.1)  | 5/78 (6.4)        | 4/18 (22.2) | 0.61 (0.20 to 1.88), P=0.389 | 2.56 (0.69 to 9.48), P=0.159 | 4.19 (0.99 to 17.8), P=0.051  |
| Regular ICS dose halved (N=276)                             | 16/130 (12.3) | 8/109 (7.3)       | 8/37 (21.6) | 0.56 (0.23 to 1.37), P=0.208 | 1.97 (0.77 to 5.04), P=0.160 | 2.47 (1.02 to 6.01), P=0.046  |
| Regular ICS withdrawn or reduced to 'as needed' use (N=108) | 6/70 (8.6)    | 3/35 (8.6)        | 2/3 (66.7)  | 1.00 (0.23 to 4.26), P=1.000 | 21.3 (1.68 to 271), P=0.018  | 21.3 (1.76 to 259), P=0.016   |

n = number of participants with  $\geq 1$  exacerbation, N = total number of participants, OR = Odds Ratio, FeNO = fractional exhaled nitric oxide, ICS = inhaled corticosteroids, CI = confidence interval  
Definition of FeNO categories: high  $\geq 50$ ppb (parts per billion), intermediate ( $>20$  to  $<50$ ppb), low ( $\leq 20$ ppb). Crude OR adjusted for within-study clustering only.
