# Supplementary material
Source: HighWire-hosted journal article supplement (https://erj.ersjournals.com/content/55/5/1902150)
Supplement: inline-supplementary-material-5 [file inline-supplementary-material-5.pdf]

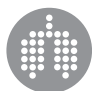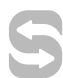

SHAREABLE PDF

# Using fractional exhaled nitric oxide to guide step-down treatment decisions in patients with asthma: a systematic review and individual patient data meta-analysis

Kay Wang<sup>1</sup>, Jan Y. Verbakel<sup>2</sup>, Jason Oke<sup>1</sup>, Alexander Fleming-Nouri<sup>3</sup>, Josh Brewin<sup>1</sup>, Nia Roberts<sup>4</sup>, Norihiro Harada <sup>5</sup>, Ryo Atsuta<sup>5</sup>, Kazuhisa Takahashi<sup>5</sup>, Kazutaka Mori<sup>6</sup>, Tomoyuki Fujisawa <sup>6</sup>, Toshihiro Shirai<sup>7</sup>, Tomotaka Kawayama<sup>8</sup>, Hiromasa Inoue<sup>9</sup>, Stephen Lazarus<sup>10</sup>, Stanley Szeffler<sup>11</sup>, Fernando Martinez<sup>12</sup>, Dominick Shaw <sup>13</sup>, Ian D. Pavord<sup>14</sup> and Mike Thomas <sup>15</sup>

**Affiliations:** <sup>1</sup>Nuffield Dept of Primary Care Health Sciences, University of Oxford, Oxford, UK. <sup>2</sup>KU Leuven, Dept of Public Health and Primary Care, Leuven, Belgium. <sup>3</sup>Oxford University Clinical Academic Graduate School, University of Oxford, Oxford, UK. <sup>4</sup>Bodleian Health Care Libraries, University of Oxford, Oxford, UK. <sup>5</sup>Dept of Respiratory Medicine, Juntendo University Faculty of Medicine and Graduate School of Medicine, Tokyo, Japan. <sup>6</sup>Second Division Dept of Internal Medicine, Hamamatsu University School of Medicine, Hamamatsu, Japan. <sup>7</sup>Dept of Respiratory Medicine, Shizuoka General Hospital, Shizuoka, Japan. <sup>8</sup>Division of Respiriology, Neurology, and Rheumatology, Kurume University School of Medicine, Kurume, Japan. <sup>9</sup>Dept of Pulmonary Medicine, Graduate School of Medical and Dental Sciences, Kagoshima University, Kagoshima, Japan. <sup>10</sup>Division of Pulmonary and Critical Care Medicine, University of California, San Francisco, CA, USA. <sup>11</sup>Children's Hospital Colorado, The Breathing Institute, Dept of Pediatrics, University of Colorado School of Medicine, Anschutz Medical Campus, Aurora, CO, USA. <sup>12</sup>Asthma and Airway Disease Research Center, University of Arizona, Tucson, AZ, USA. <sup>13</sup>Nottingham Respiratory Research Unit, University of Nottingham, Nottingham, UK. <sup>14</sup>Oxford Respiratory NIHR BRC and Respiratory Medicine Unit, Nuffield Dept of Medicine, University of Oxford, Oxford, UK. <sup>15</sup>Primary Care, Population Sciences and Medical Education (PPM), University of Southampton, Southampton, UK.

**Correspondence:** Kay Wang, Nuffield Dept of Primary Care Health Sciences, Radcliffe Primary Care, Woodstock Road, Oxford, OX2 6GG, UK. E-mail: kay.wang@phc.ox.ac.uk

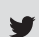

@ERSpublications

In nonsmoking patients with mild-to-moderate well-controlled asthma, stepping down treatment when  $F_{ENO}$  is <50 ppb reduces prescribing of inhaled corticosteroids without increasing exacerbations <http://bit.ly/2SKaxSt>

**Cite this article as:** Wang K, Verbakel JY, Oke J, *et al.* Using fractional exhaled nitric oxide to guide step-down treatment decisions in patients with asthma: a systematic review and individual patient data meta-analysis. *Eur Respir J* 2020; 55: 1902150 [<https://doi.org/10.1183/13993003.02150-2019>].

This single-page version can be shared freely online.

## ABSTRACT

**Background:** High exhaled nitric oxide fraction ( $F_{ENO}$ ) levels are associated with greater risk of asthma exacerbation. However, it is not clear how  $F_{ENO}$  can be used to guide safe reductions in inhaled corticosteroid (ICS) doses in asthma patients. This study assesses the ability of  $F_{ENO}$  to guide ICS reductions.

**Methods:** Systematic searching of electronic databases identified prospective observational studies and randomised controlled trials which recruited participants with mild-to-moderate asthma aged  $\geq 12$  years and measured  $F_{ENO}$  before reducing ICS. We performed multilevel mixed-effects logistic regression in relation to acute exacerbations and estimated each participant's exacerbation risk using our logistic

regression model.

**Results:** We included data from seven out of eight eligible studies, representing 384 participants. ICS doses were halved in four studies and withdrawn in three studies. A baseline  $F_{\text{ENO}}$  measurement of  $\geq 50$  ppb was associated with increased risk of exacerbations (crude OR 3.14, 95% CI 1.41–7.00,  $p=0.005$ ; adjusted OR 3.08, 95% CI 1.36–6.98,  $p=0.007$ ) and corresponded to an estimated exacerbation risk cut-off of 15%. Reducing ICS when estimated exacerbation risk was  $<15\%$  *versus*  $<10\%$  would result in fewer patients remaining on the same ICS dose (40 (10.4%) out of 384 *versus* 141 (36.7%) out of 384), but similar proportions of patients avoiding exacerbations (222 (91.4%) out of 243, 95% CI 87.1–94.6% *versus* 311 (90.4%) out of 344, 95% CI 86.8–93.3%).

**Conclusion:** In patients with mild-to-moderate asthma, gradual ICS reduction when  $F_{\text{ENO}}$  is  $<50$  ppb may help decrease ICS use without increasing exacerbations. Future research should aim to validate these findings in larger populations.
